# Supplementary material for: The Macquarie Island [LoFlo2G] high-precision continuous atmospheric carbon dioxide record
Source: Copernicus journal article supplement (doi:10.5194/amt-2018-300), 2018-10-25
Supplement: Supplementary file [file amt-2018-300-RC2-supplement.pdf]

## Review report

Journal : AMT

MS No. : amt-2018-300

Title : **The Macquarie Island [LoFlo2G] high-precision continuous atmospheric carbon dioxide record**

Author(s) : Ann R. Stavert et al.

The authors report on high-precision continuous measurements of carbon dioxide (CO<sub>2</sub>) in the framework of the Commonwealth Scientific and Industrial Research Organisation (CSIRO). The measurements were performed at Macquarie Island in the Southern Ocean region using a LoFlo2 instrument based on non dispersive infrared (NDIR) method. A detailed discussion is given on protocols of measurements and calibration, analysis of measurement uncertainty sources and procedures for baseline determination.

### General comments

The manuscript is well structured and written, scientifically sound. It would be acceptable for publication in AMT after minor revision by addressing the comments and questions listed below.

### Specific comments

(1) Page 14, section 5 "Defining a baseline record" : the authors discussed how to remove influences of local flux and Southern Hemisphere land flux to achieve a regional background CO<sub>2</sub> observation. Should be considered the ocean-atmosphere CO<sub>2</sub> exchange in this case? If yes, how to take into account such influence?

(2) Page 16, section 5.3 "Curve fitting" : a low-pass filter is used to fit the hourly CO<sub>2</sub> data to smooth the time-series results. Is the Kalman filtering method more suitable for such application? As an adaptive filtering technique, Kalman filter can efficiently remove the shot-to-shot variability related to the real-time noise in the measured data with minimal deformation of the physical quantity to be measured. Kalman filtering method has been successfully applied to perform fast and high-precision measurements of trace gas concentration [*Appl. Phys. B* **74** (2002) 85-93] and isotope ratio [*Opt. Lett.* **35** (2010) 634–636].

### Technical corrections

(1) Page 6, line 8 and line 28 : "Fig. 2e" should be "Fig. 2f"?

(2) Please make larger the following figures 2, 4, 6 and 7.

(3) Some sentences are too long. It would be better to rephrase them and to make them more understandable. For instance,

Page 2, lines 27-30 : "While the performance .... to reduced calibration requirements";

Page 5, lines 24-26 : "Macquarie Island .... sample measurements";

Page 8, lines 24-26 : "This is independent .... in a calibration run)";

Page 10, lines 2-4 : "The uncertainty .... 18 reference standards";

Page 15, lines 21-23 : "Radon is input .... and zero poleward of 70°";

Page 15, lines 27-29 : "Radon selection .... for radon of 20 mBqSCM-1";

Page 17, lines 21-23 : "Tropical and northern .... Frederiksen, 2016)";

Page 18, lines 7-9 : "The in-situ .... by multiple orders of magnitude";

....
